# Supplementary material for: Crystal structure of VmoLac, a tentative quorum quenching lactonase from the extremophilic crenarchaeon Vulcanisaeta moutnovskia
Source: PubMed Central journal article supplement (PMC4323659; doi:10.1038/srep08372), 2015-02-11
Supplement: srep08372-s1.pdf [file srep08372-s1.pdf]

1  
2  
3  
4  
5  
6  
7  
8  
9  
10

SUPPLEMENTARY INFORMATION FOR

**Crystal structure of *VmoLac*, a tentative quorum quenching  
lactonase from the extremophilic crenarchaeon *Vulcanisaeta  
moutnovskia***

*Structure of the lactonase VmoLac*

**Julien HIBLOT<sup>1\*</sup>, Janek BZDRENGA<sup>2\*</sup>, Charlotte CHAMPION<sup>2</sup>, Eric CHABRIERE<sup>2#</sup>, Mikael  
ELIAS<sup>2#</sup>**

11  
12  
13  
14  
15  
16  
17  
18  
19  
20  
21  
22  
23  
24  
25  
26  
27  
28  
29  
30  
31

SUPPLEMENTARY INFORMATION

**Figure S1:** Biochemical analysis of *VmoLac* enzyme

**Figure S2:** Chemical structure of phosphoesters (I-V), esters (VI-VIII) and lactones (IX-XXIII)

**Figure S3:** Structural superposition of several PLL with *VmoLac*

**Figure S4:** Surface electrostatic potential of *VmoLac*

**Figure S5:** Surface salt bridge network example in the *VmoLac* structure

**Figure S6:** Contacts between *VmoLac* active site in the packing contact

**Figure S7:** Superposition of *VmoLac* structures solved in P64 (green) and P622 space groups.

**Figure S8:** Anomalous X-ray scattering characterization of the *VmoLac* bimetallic center

**Figure S9:** Fourier difference maps of the bound ligands in *VmoLac* structures

**Figure S10:** Superposition of monomers from homodimers of *VmoLac* bound to a fatty acid (A.) and to 3-oxo-C10 AHL (B.)

**Figure S11:** Superposition of the structure bound to a fatty acid with the structure bound to the AHL.

**Table S1:** Accession numbers of the sequences used in the phylogeny study

**Table S2:** Protein sequence identity between PLLs and *BdPTE*

**Table S3:** Anomalous X-ray data collection

32

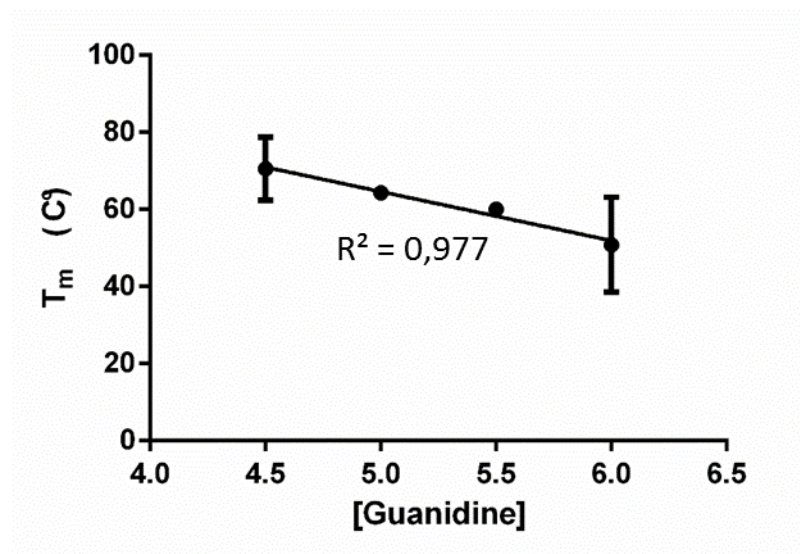

33

34 **Figure S1:** Biochemical analysis of the *VmoLac* enzyme

35 The protein thermostability has been evaluated using different concentration of guanidinium  
36 chloride (4.5, 5, 5.5 and 6 M). The melting-temperature (T<sub>m</sub>) of *VmoLac* has been extrapolated  
37 at a guanidine concentration equal to 0 using a linear regression and was evaluated to 128 ±  
38 7° C.

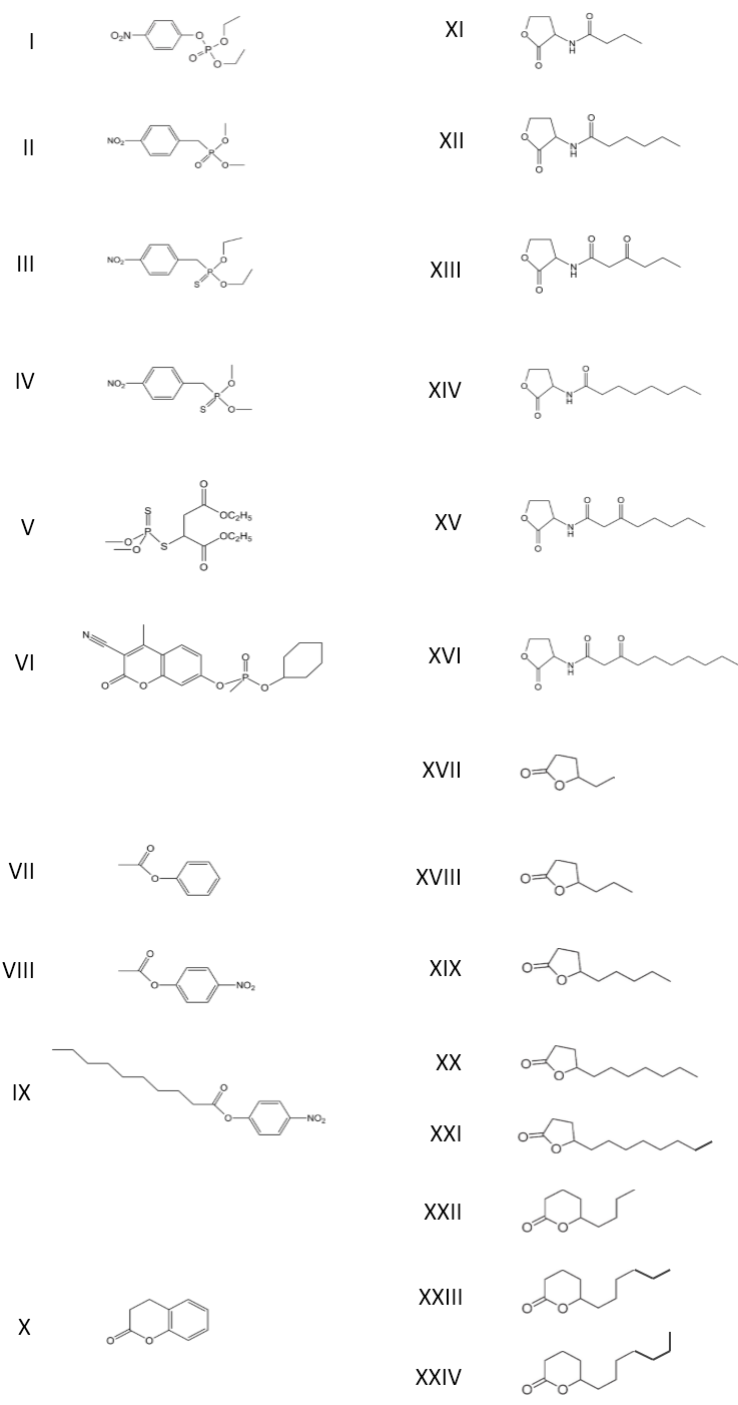

39

40 **Figure S2:** Chemical structure of phosphoesters (I-VI), esters (VII-IX) and lactones (X-XXIV)

41 Chemical structure of ethyl-paraoxon (I), methyl-paraoxon (II), ethyl-parathion (III), methyl-  
 42 parathion (IV), malathion (V), CMP-Coumarin (VI) phenyl-acetate (VII), *p*NP-acetate (VIII),  
 43 *p*NP-decanoate (IX), dihydrocoumarin (X), C4-AHL (XI), C6-AHL (XII), 3-oxo-C6-AHL  
 44 (XIII), C8-AHL (XIV), 3-oxo-C8-AHL (XV), 3-oxo-C10-AHL (XVI),  $\gamma$ -caprolactone (XVII),  
 45  $\gamma$ -heptanolide (XVIII), Nonanoic- $\gamma$ -lactone (XIX), Undecanoic- $\gamma$ -lactone (XX), Dodecanoic- $\gamma$ -  
 46 lactone (XXI) Nonanoic- $\delta$ -lactone (XXII), Undecanoic- $\delta$ -lactone (XXIII) and Dodecanoic- $\delta$ -  
 47 lactone (XXIV)

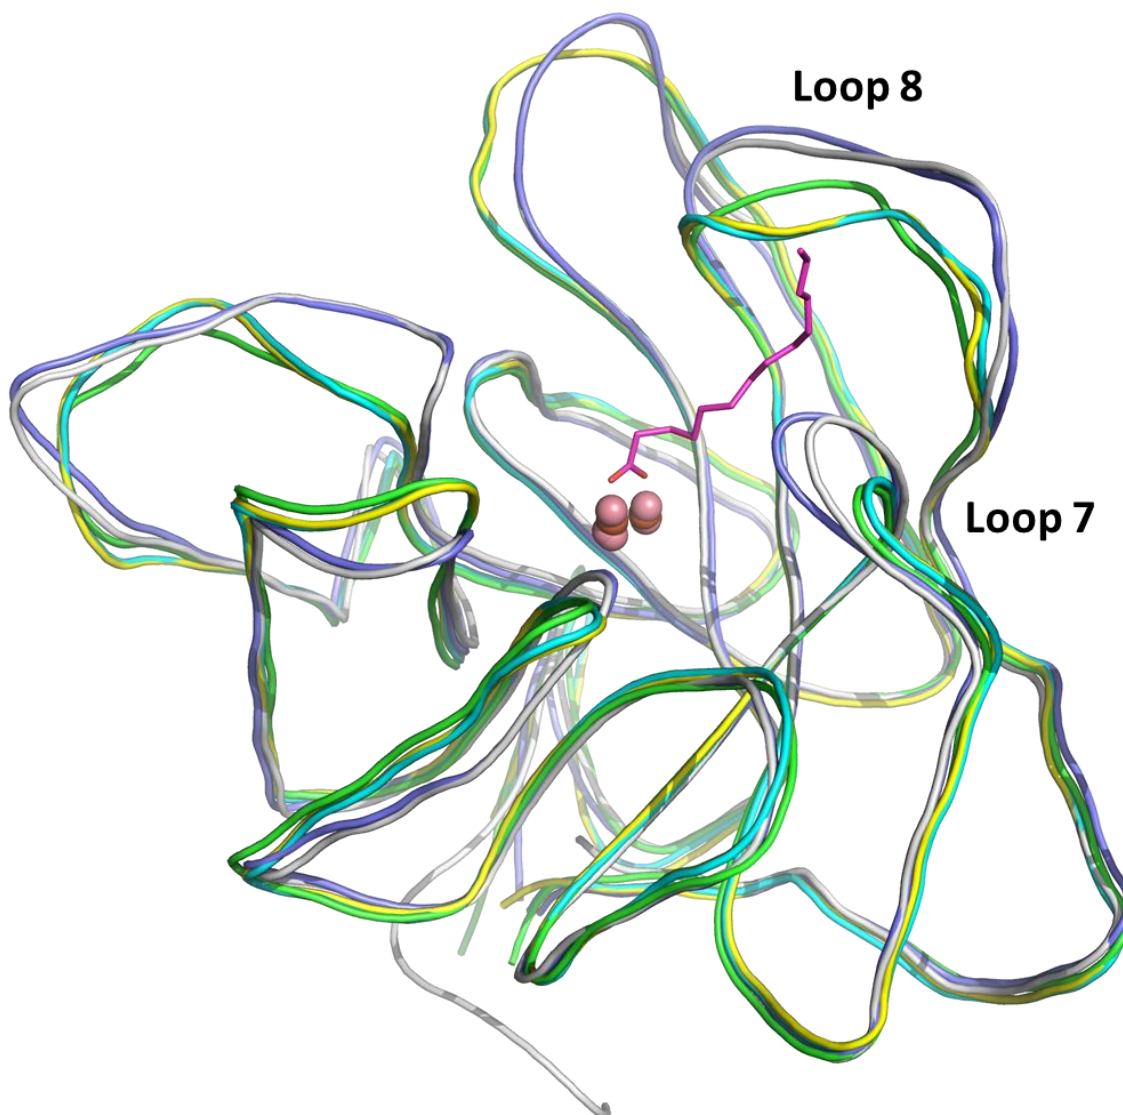

48

49 **Figure S3:** Structural superposition of several PLLs with *VmoLac*

50 Structures of *VmoLac* (green), *SsoPox* (cyan, 2VC5), *SisLac* (yellow, 4G2D), *DrOPH* (grey,  
51 2ZC1) and *GkL* (blue, 3OJG) are represented as smoothed ribbon. The bimetallic center is  
52 represented by spheres: light pink for cobalt, orange for iron and blue for zinc.

53

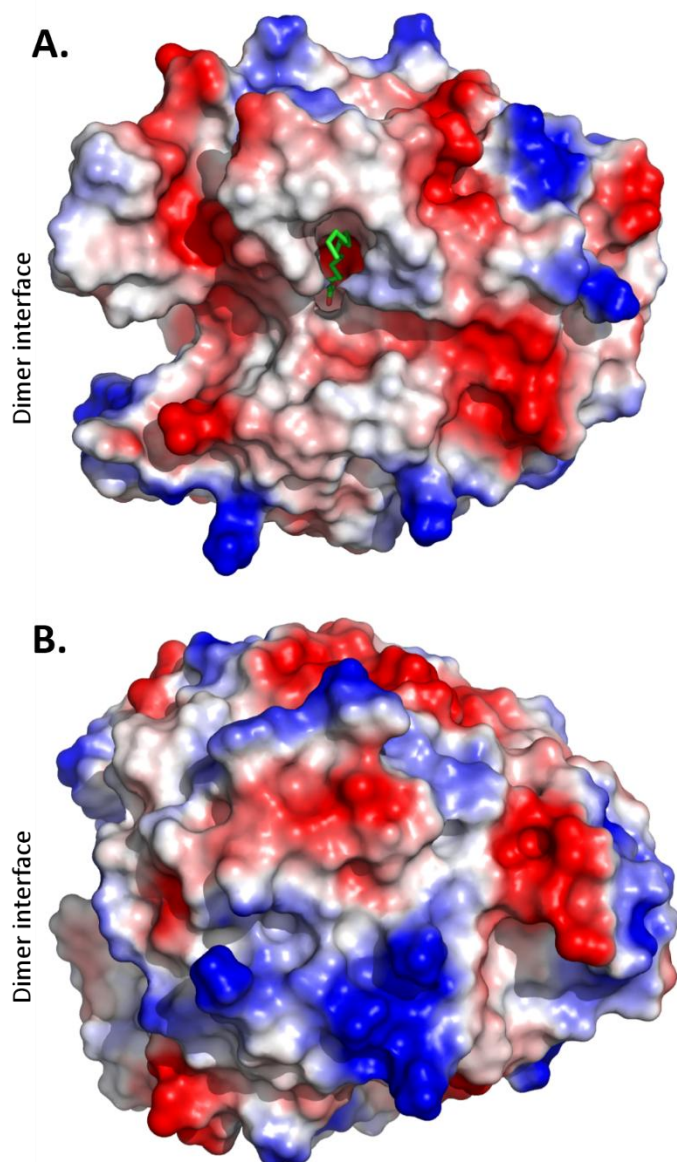

54

55 **Figure S4:** Surface electrostatic potential of *VmoLac*

56 The surface electrostatic potential of a monomer is represented on face (A) and face (B).  
57 Negatively charged areas are depicted in red, whereas positively charged areas are in blue and  
58 uncharged areas are in white. The active site crevice is indicated by the presence of the bound  
59 fatty acid (green sticks, face (A))

60

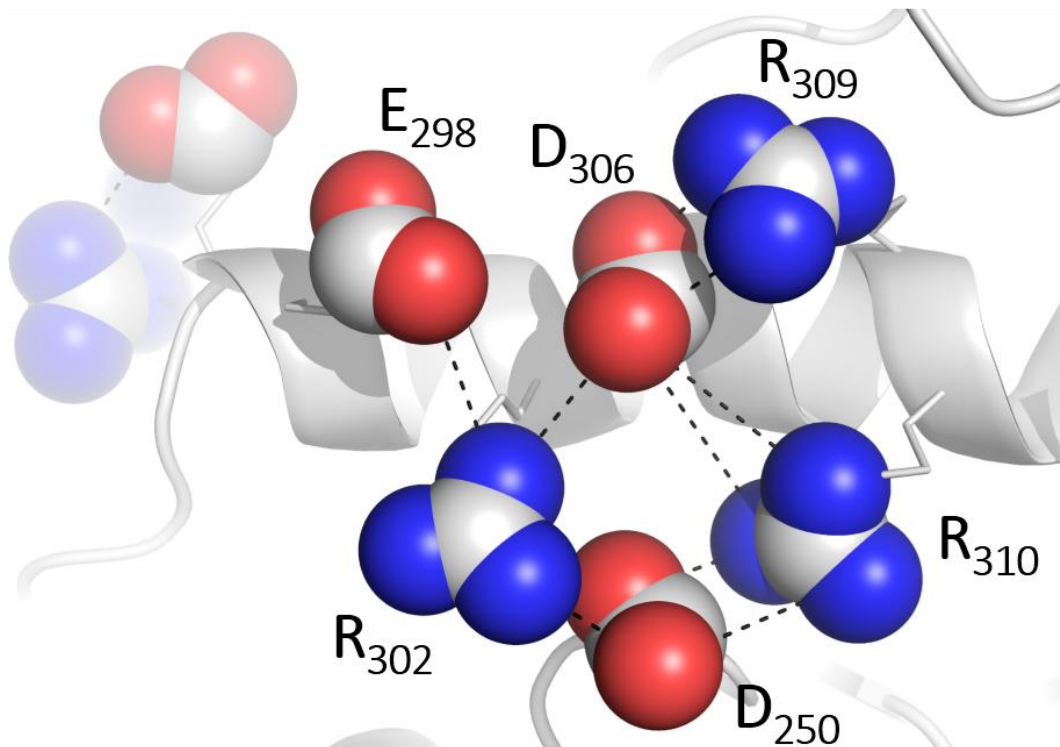

61

62

63

64

65 **Figure S5: Surface salt bridge network example in the *VmoLac* structure**

66 The charge groups of involved residues are shown as spheres. Ionic interactions are indicated  
67 by black dashes.

68



69

70

71

72

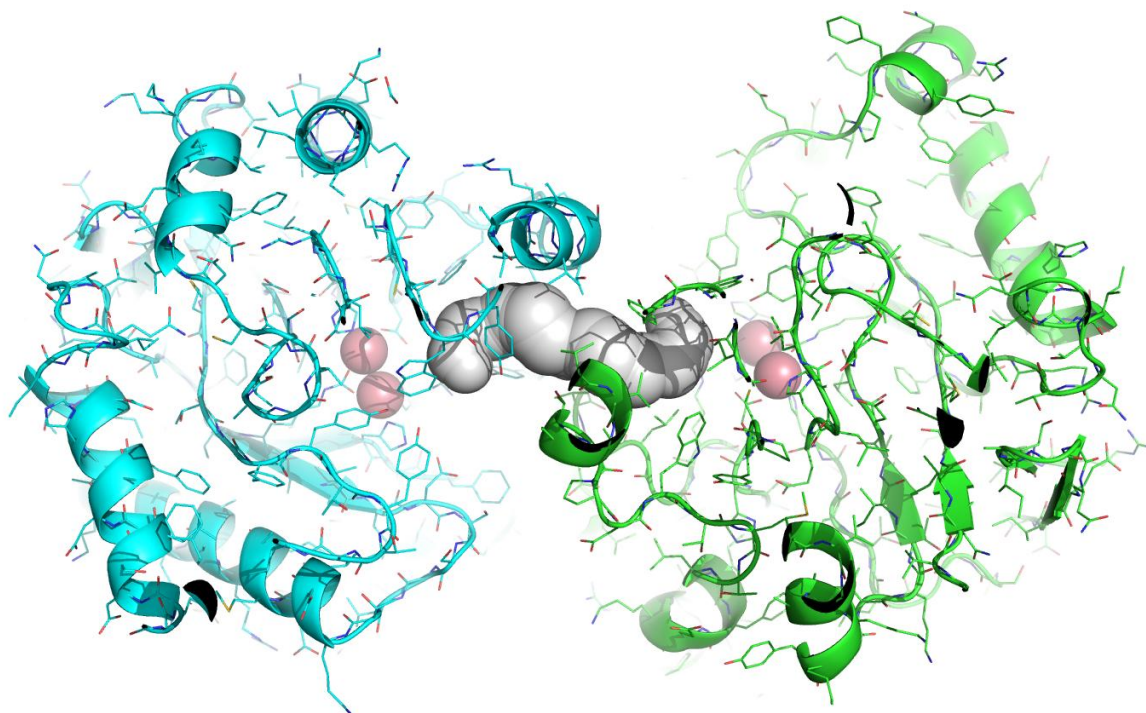

73

74 **Figure S6:** Contacts between *VmoLac* active site in the packing contact

75 *VmoLac* molecules are shown in cartoon (green and blue) at the crystallographic interface. The  
76 active site channels of both monomers (grey surface) are connected. The two active site metal



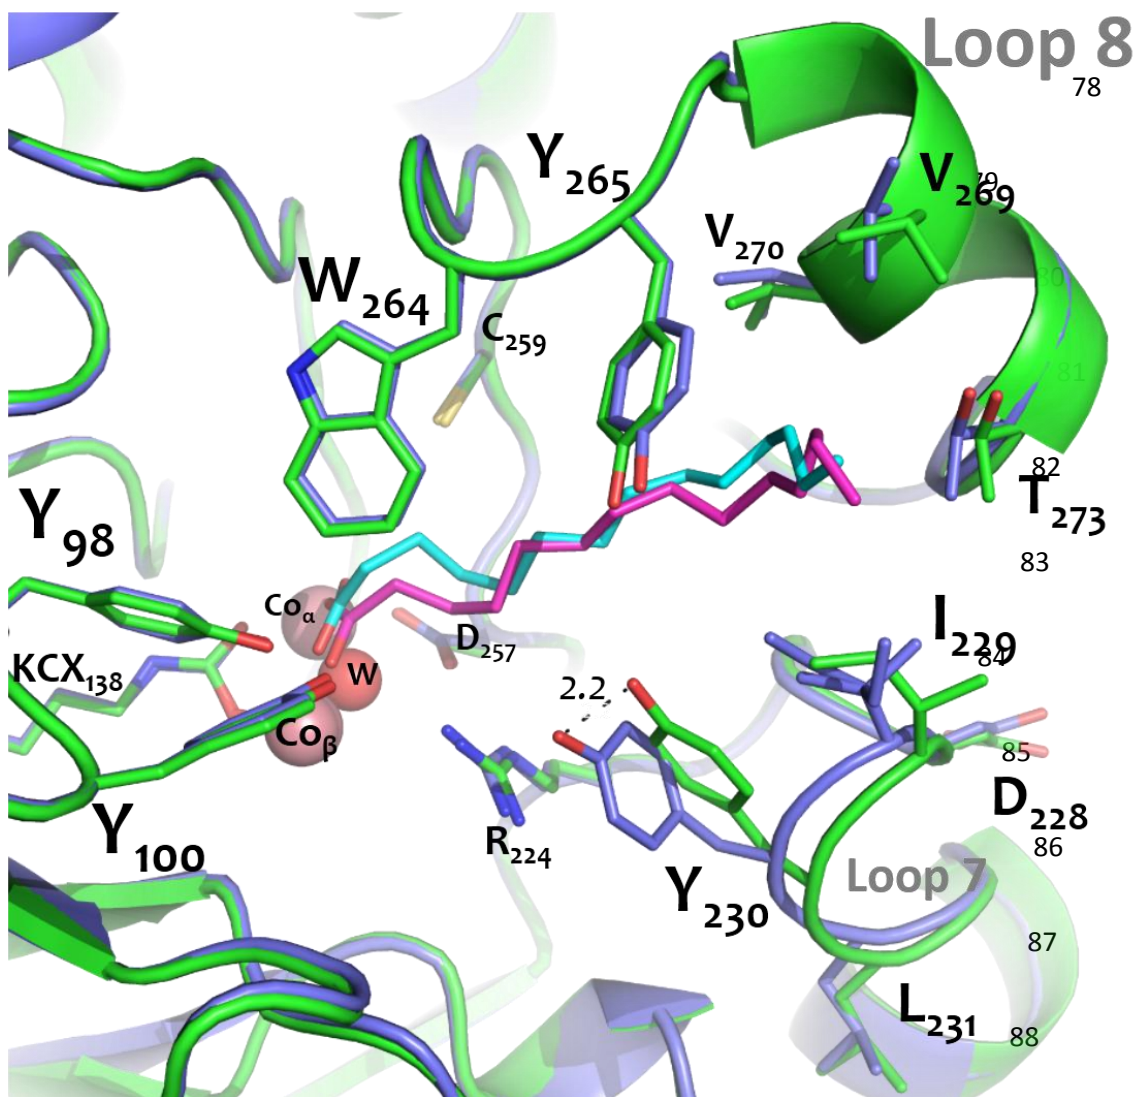

89

90 **Figure S7:** Superposition of *VmoLac* structures solved in P6<sub>4</sub> (green) and P6<sub>22</sub> space groups.

91 Active site superposition of *VmoLac* monomers from P6<sub>4</sub> (green) and P6<sub>22</sub> (dark blue) space  
 92 group crystals. Colors are conserved as previously. Active site residues are represented as  
 93 sticks.

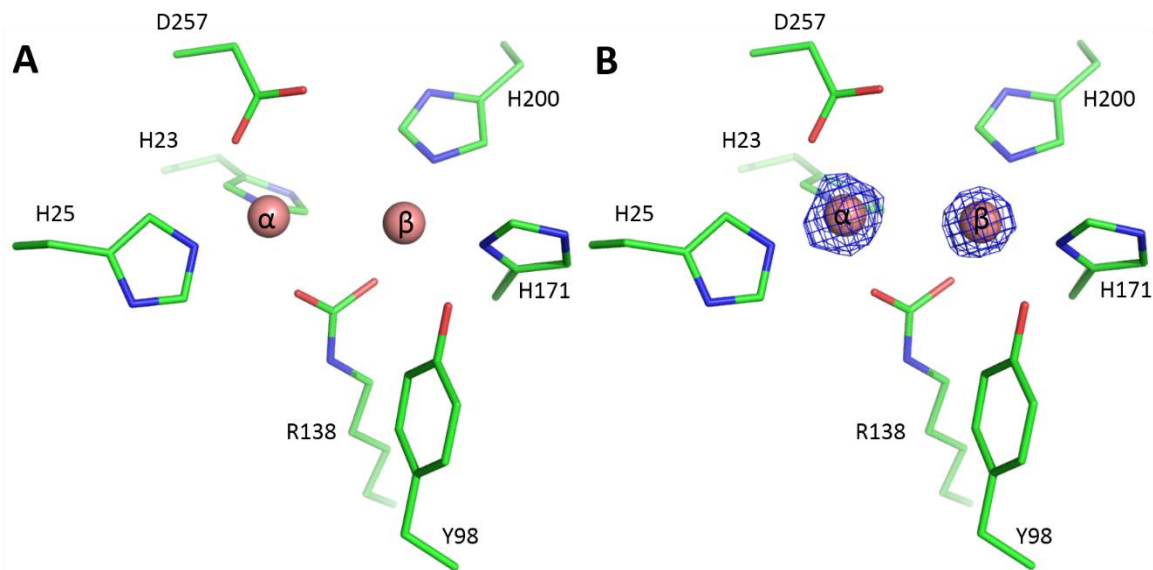

94

95 **Figure S8:** Anomalous X-ray scattering characterization of the *VmoLac* bimetallic center.

96 The Bijvoet difference Fourier maps from data collections at the arsenic atom peak (energy =

97 7.725kEV (**B**)) or remote (7.7kEV (**A**)) are contoured at  $5\sigma$ . The high anomalous peaks (14 and

98 11.5 $\sigma$  for  $\alpha$  and  $\beta$  sites, respectively) at the cobalt atom anomalous edge and the absence of

99 anomalous signal at slightly lower energy indicate the presence of cobalt in the protein's active

100 site.

101

102

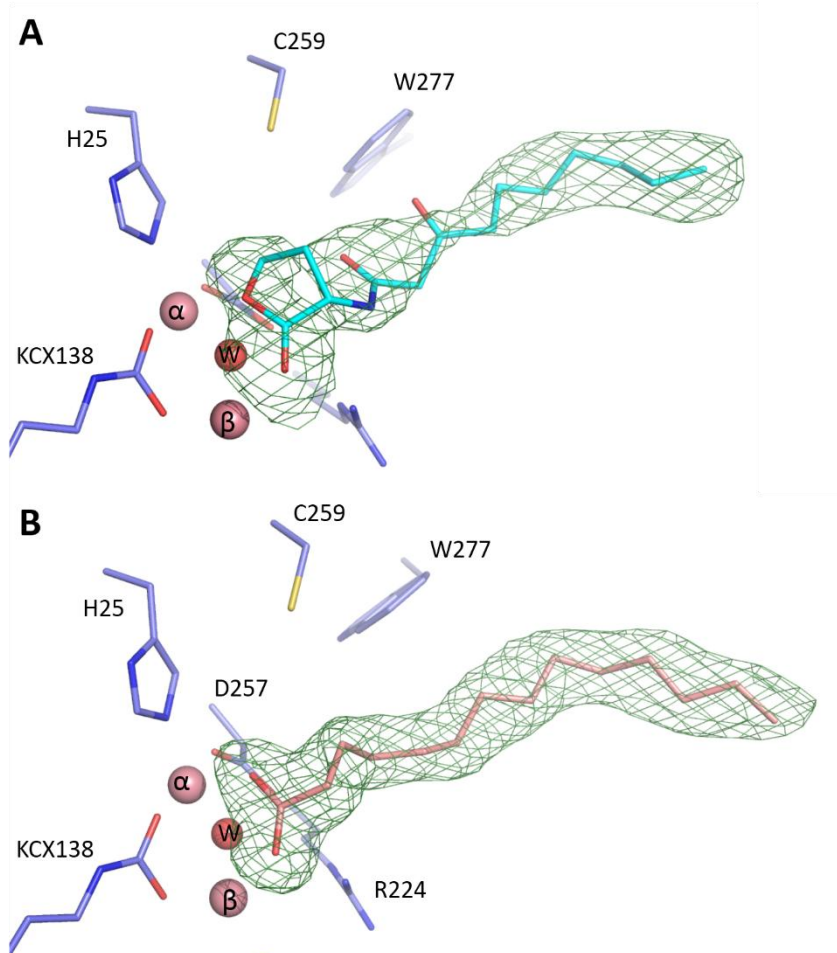

103

104

105 **Figure S9:** Fourier difference omit maps of the bound ligands in *VmoLac* structures.

106 (A) *VmoLac* structure (blue sticks) bound to 3-oxo-C10 AHL (cyan sticks). The omit  $F_{\text{obs}}-F_{\text{calc}}$

107 is contoured at  $2.5 \sigma$  (green mesh). (B) *VmoLac* structure (blue sticks) bound to a fatty acid,

108 modelled as myristic acid (pink sticks). The omit  $F_{\text{obs}}-F_{\text{calc}}$  is contoured at  $3 \sigma$  (green mesh).

109 Metal cations and the putative catalytic water molecule are shown as spheres (pink and red,  
110 respectively).

111

112

113

114

115  
116  
117  
118  
119  
120  
121  
122  
123  
124  
125  
126  
127  
128  
129  
130  
131  
132  
133  
134  
135  
136  
137  
138  
139  
140

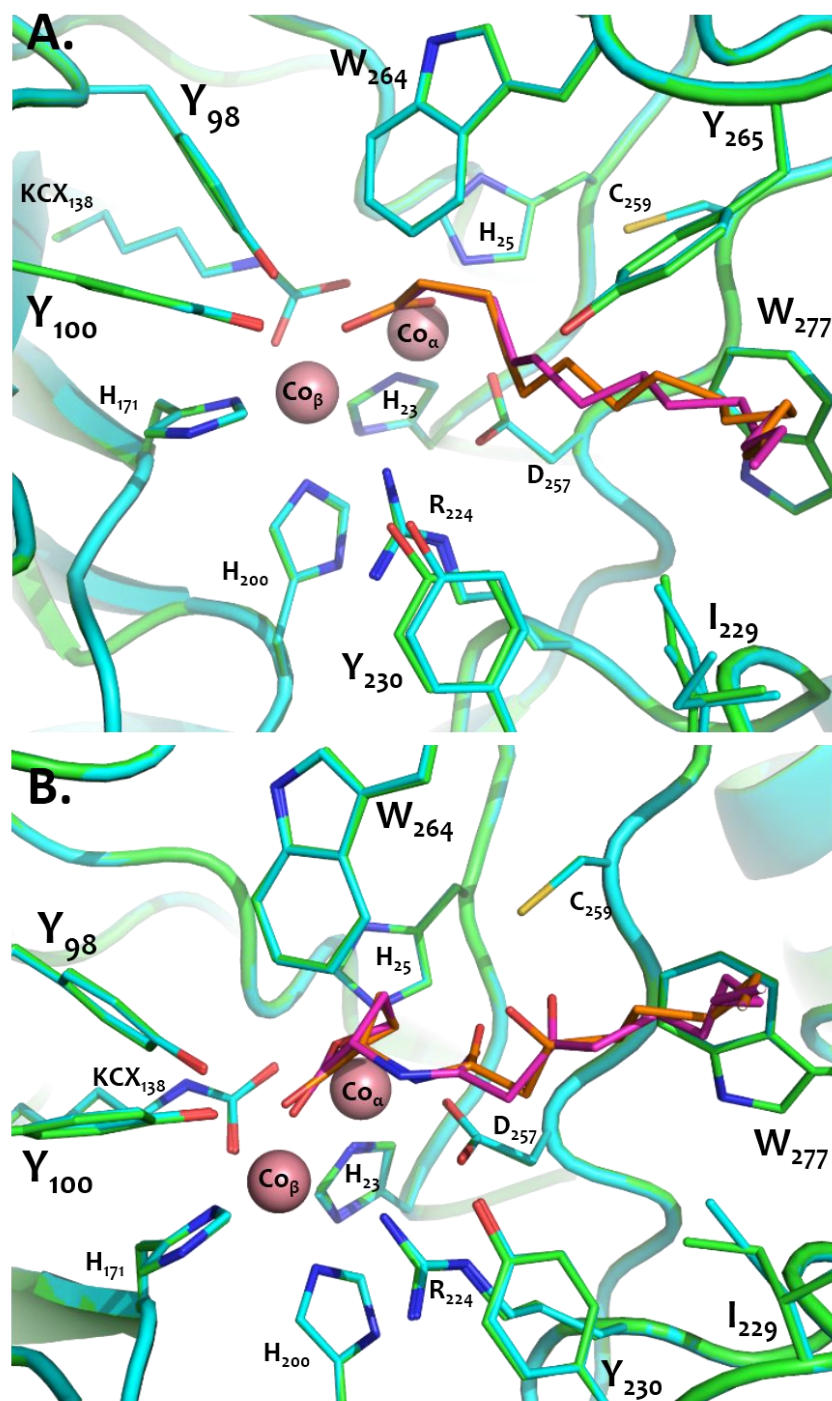

141 **Figure S10:** Superposition of monomers from homodimers of *VmoLac* bound to a fatty acid  
142 **(A.)** and to 3-oxo-C10 AHL **(B.)**

143 Monomers A and B for each of the two structures were superposed. Each monomers are  
144 represented in green and cyan with respective bound molecule in pink and orange. Cobalt  
145 atoms are represented as light pink balls and residues as sticks.

146

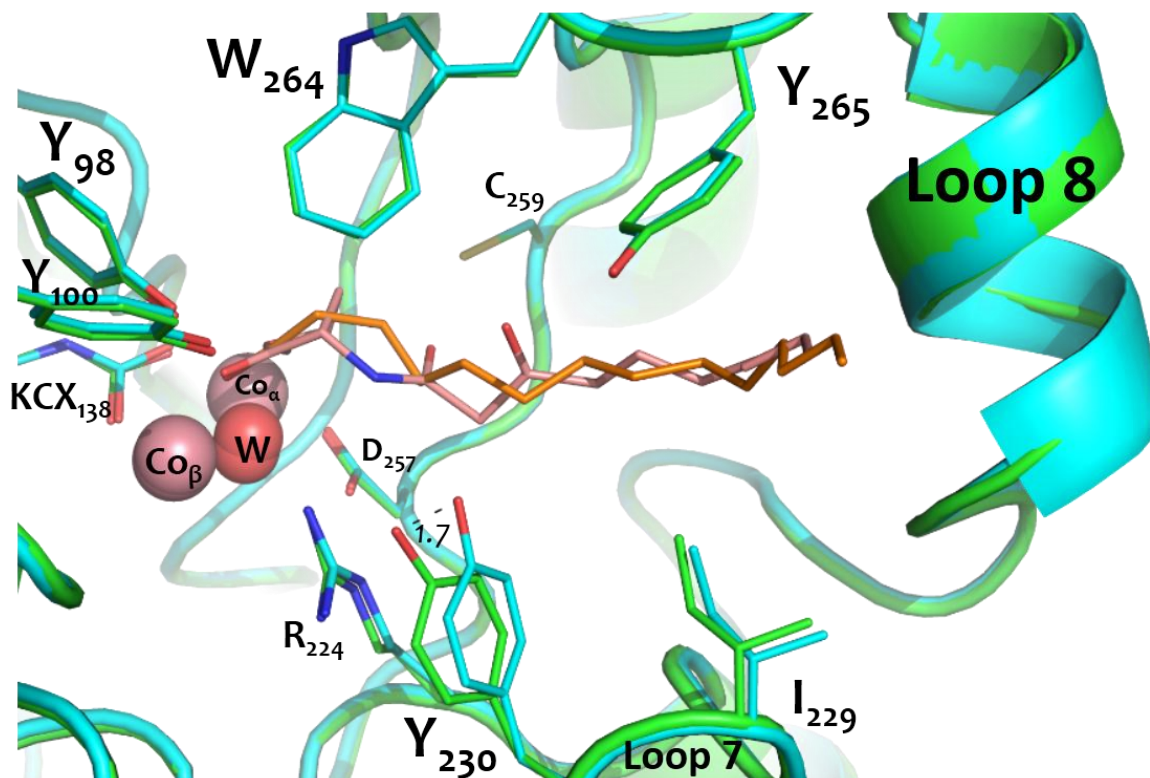

147

148 **Figure S11: Superposition of the structure bound to a fatty acid with the structure bound**  
 149 **to the AHL.**

150 Comparison of the binding mode of the fatty acid (modeled as myristic acid (orange sticks)  
 151 bound to *VmoLac* (green sticks and cartoon)) and 3-oxo-C10 AHL (light pink sticks, bound to  
 152 *VmoLac* (cyan sticks and cartoon)). Cobalt cations and the bridging water molecule are  
 153 represented by light pink and red spheres, respectively.

**Table S1:** Accession numbers of the sequences used in the phylogeny study

| <b>Sequence</b>                                                              | <b>NCBI Accession number</b>   |
|------------------------------------------------------------------------------|--------------------------------|
| <b>GsP</b> ( <i>Geobacillus thermodenitrificans</i> )                        | <a href="#">YP_001125472.1</a> |
| <b>GkL</b> ( <i>Geobacillus kaustophilus</i> )                               | <a href="#">YP_147359.1</a>    |
| <b>DrOPH</b> ( <i>Deinococcus radiodurans</i> )                              | <a href="#">NP_294654.1</a>    |
| <b>1HZY PTE</b> ( <i>Pseudomonas diminuta</i> )                              | <a href="#">GI:13786715</a>    |
| <b>PTEflavob</b> ( <i>Flavobacterium</i> sp.)                                | <a href="#">AAV39527.1</a>     |
| <b>PTEAgrobac</b> ( <i>Agrobacterium tumefaciens</i> )                       | <a href="#">AAK85308.1</a>     |
| <b>2R1M opd</b> ( <i>Agrobacterium radibacter</i> )                          | <a href="#">GI:167744959</a>   |
| <b>PLLBreviba</b> ( <i>Brevibacterium mcbrellneri</i> )                      | <a href="#">WP_005881372.1</a> |
| <b>PLLDermaco</b> ( <i>Dermacoccus</i> sp.)                                  | <a href="#">WP_006945246.1</a> |
| <b>AhlA</b> ( <i>Rhodococcus erythropolis</i> )                              | <a href="#">WP_003943005.1</a> |
| <b>QsdA</b> ( <i>Rhodococcus erythropolis</i> )                              | <a href="#">ABQ42704.1</a>     |
| <b>PLLRhodoco</b> ( <i>Rhodococcus jostii</i> )                              | <a href="#">YP_701486.1</a>    |
| <b>PLLStrepto</b> ( <i>Streptosprangium roseum</i> )                         | <a href="#">YP_003338238.1</a> |
| <b>MCP</b> ( <i>Mycobacterium avium</i> subsp. <i>paratuberculosis</i> K-10) | <a href="#">NP_962602.1</a>    |
| <b>PPH</b> ( <i>Mycobacterium tuberculosis</i> )                             | <a href="#">NP_214744.1</a>    |
| <b>PLLMycobCD</b> ( <i>Mycobacterium tuberculosis</i> )                      | <a href="#">NP_214744.1</a>    |
| <b>PLLMycbovi</b> ( <i>Mycobacterium bovis</i> )                             | <a href="#">NP_853900.1</a>    |
| <b>SacPox</b> ( <i>Sulfolobus acidocaldarius</i> )                           | <a href="#">YP_256726.1</a>    |
| <b>SisLac</b> ( <i>Sulfolobus islandicus</i> )                               | <a href="#">YP_002828495.1</a> |
| <b>SsoPox</b> ( <i>Sulfolobus solfataricus</i> )                             | <a href="#">NP_343863.1</a>    |
| <b>VmoLac</b> ( <i>Vulcanisaeta moutnovskia</i> )                            | <a href="#">YP_004245953</a>   |
| <b>Symbact</b> ( <i>Symbiobacterium thermophilum</i> )                       | <a href="#">YP_074383.1</a>    |
| <b>PHP_E</b> ( <i>Escherichia coli</i> )                                     | <a href="#">YP_001723339.1</a> |
| <b>PHP_P</b> ( <i>Photorhabdus asymbitoca</i> )                              | <a href="#">YP_003041416.1</a> |
| <b>PHP_Y</b> ( <i>Yersinia aldovae</i> )                                     | <a href="#">WP_004702383.1</a> |
| <b>PHP_X</b> ( <i>Xenorhabdus bovienii</i> )                                 | <a href="#">YP_003466084.1</a> |
| <b>RTX_K1</b> ( <i>Klebsellia pneumoniae</i> )                               | <a href="#">YP_001335395.1</a> |
| <b>RTX_K2</b> ( <i>Klebsellia variicola</i> )                                | <a href="#">YP_003439523.1</a> |
| <b>RTX_P</b> ( <i>Pseudomonas syringiae</i> )                                | <a href="#">EGH93047.1</a>     |
| <b>RTX_3K</b> ( <i>Rhodobacter sphaeroides</i> )                             | <a href="#">YP_001045290.1</a> |

156 **Table S2:** Protein sequence identity between PLLs and *BdPTE*

|                  | <i>BdPTE</i> | <i>SsoPox</i> | <i>SisLac</i> | <i>SacPox</i> | <i>VmoLac</i> | <i>PPH</i> | <i>MCP</i> | <i>AhlA/QsdA</i> | <i>DrOPH</i> | <i>GkL</i> | <i>GsP</i> |
|------------------|--------------|---------------|---------------|---------------|---------------|------------|------------|------------------|--------------|------------|------------|
| <i>BdPTE</i>     | -            | 32.8          | 32.2          | 33.8          | 29            | 34.8       | 35.7       | 28.9             | 30.34        | 27.2       | 27.2       |
| <i>SsoPox</i>    |              | -             | 91.4          | 76.1          | 52            | 39.2       | 37.6       | 37.9             | 28.34        | 33.8       | 32.9       |
| <i>SisLac</i>    |              |               | -             | 76.1          | 51.27         | 37.6       | 36.31      | 36.6             | 27.4         | 33.8       | 32.2       |
| <i>SacPox</i>    |              |               |               | -             | 51.9          | 39.8       | 39.2       | 38.5             | 30.6         | 33.1       | 32.2       |
| <i>VmoLac</i>    |              |               |               |               | -             | 41.1       | 40.8       | 36               | 29           | 29.6       | 28.3       |
| <i>PPH</i>       |              |               |               |               |               | -          | 92         | 59               | 31.6         | 32.7       | 32.4       |
| <i>MCP</i>       |              |               |               |               |               |            | -          | 58.7             | 31.6         | 32.7       | 32.7       |
| <i>AhlA/QsdA</i> |              |               |               |               |               |            |            | -                | 32           | 30.8       | 31.1       |
| <i>DrOPH</i>     |              |               |               |               |               |            |            |                  | -            | 58.8       | 60.7       |
| <i>GkL</i>       |              |               |               |               |               |            |            |                  |              | -          | 90.4       |

157

158

159

160



161 **Table S3: Anomalous X-ray data collection**

| Data collection                                                                                                                                                                                                                                                                                                    |                                                                                  |                                                                                  |
|--------------------------------------------------------------------------------------------------------------------------------------------------------------------------------------------------------------------------------------------------------------------------------------------------------------------|----------------------------------------------------------------------------------|----------------------------------------------------------------------------------|
| Dataset                                                                                                                                                                                                                                                                                                            | Co-K edge high                                                                   | Co-K edge low                                                                    |
| Beamline                                                                                                                                                                                                                                                                                                           | ID29                                                                             | ID29                                                                             |
| Wavelength (Å)                                                                                                                                                                                                                                                                                                     | 1.6049 Å                                                                         | 1.6101 Å                                                                         |
| Detector                                                                                                                                                                                                                                                                                                           | PILATUS 6M                                                                       | PILATUS 6M                                                                       |
| Oscillation (°)                                                                                                                                                                                                                                                                                                    | 0.1                                                                              | 0.1                                                                              |
| Number of frames                                                                                                                                                                                                                                                                                                   | 3600                                                                             | 3600                                                                             |
| Resolution (Å) (last bin)                                                                                                                                                                                                                                                                                          | 1.8 (1.9-1.8)                                                                    | 1.7 (1.8-1.7)                                                                    |
| Space group                                                                                                                                                                                                                                                                                                        | P6 <sub>4</sub>                                                                  | P6 <sub>4</sub>                                                                  |
| Unit-cell parameters (Å)                                                                                                                                                                                                                                                                                           | a = 174.87, b = 174.87, c = 62.07, $\alpha = 90$ , $\beta = 90$ , $\gamma = 120$ | a = 174.85, b = 174.85, c = 62.06, $\alpha = 90$ , $\beta = 90$ , $\gamma = 120$ |
| No. of observed reflections (last bin)                                                                                                                                                                                                                                                                             | 1 940 202 (258 680)                                                              | 2 242 020 (321 007)                                                              |
| No. of unique reflections (last bin)                                                                                                                                                                                                                                                                               | 196 781 (29 433)                                                                 | 232 940 (36 350)                                                                 |
| Completeness (%) (last bin)                                                                                                                                                                                                                                                                                        | 100 (100)                                                                        | 99.8 (98.7)                                                                      |
| R <sub>meas</sub> (%) (last bin)                                                                                                                                                                                                                                                                                   | 7.3 (53.2)                                                                       | 9.5 (74.1)                                                                       |
| I/ $\sigma$ (I) (last bin)                                                                                                                                                                                                                                                                                         | 21.74 (4.12)                                                                     | 16.25 (2.89)                                                                     |
| Redundancy (last bin)                                                                                                                                                                                                                                                                                              | 9.86 (8.79)                                                                      | 9.62 (8.83)                                                                      |
| CC (1/2) (%) (last bin)                                                                                                                                                                                                                                                                                            | 99.9 (90.9)                                                                      | 99.9 (81.3)                                                                      |
| Anomalous peak ( $\sigma$ ) <sup>#</sup>                                                                                                                                                                                                                                                                           | $\alpha$ metal = 14<br>$\beta$ metal = 11.5                                      | N/D                                                                              |
| <sup>#</sup> is the height of the anomalous peak (in $\sigma$ units) in the Bijvoet difference Fourier map at the location of the metal cations in the structure. The anomalous signal decline at lower energy, showing that the binding pocket is occupied by zinc ions, but not only. N/D is for not detectable. |                                                                                  |                                                                                  |

162

163
